# Supplementary material
Source: PubMed Central journal article supplement (PMC4731255)
Supplement: NIHMS742294-supplement-2.pdf [file NIHMS742294-supplement-2.pdf]

Corresponding Author: Bijan Pesaran

Manuscript Number: NN-A47908

Manuscript Type: Article

# Main Figures: 8

# Supplementary Figures: 10

# Supplementary Tables: 0

# Supplementary Videos: 0

## Reporting Checklist for Nature Neuroscience

This checklist is used to ensure good reporting standards and to improve the reproducibility of published results. For more information, please read [Reporting Life Sciences Research](#).

Please note that in the event of publication, it is mandatory that authors include all relevant methodological and statistical information in the manuscript.

### ▶ Statistics reporting, by figure

- Please specify the following information for each panel reporting quantitative data, and where each item is reported.
- Each figure legend should ideally contain an exact sample size (n) for each experimental group/condition, where n is an exact number and not a range, a clear definition of how n is defined (for example x cells from x slices from x animals from x litters, collected over x days), a description of the statistical test used, the results of the tests, any descriptive statistics and clearly defined error bars if applicable.
- For any experiments using custom statistics, please indicate the test used and stats obtained for each experiment.
- Each figure legend should include a statement of how many times the experiment shown was replicated in the lab; the details of sample collection should be sufficiently clear so that the replicability of the experiment is obvious to the reader.
- For experiments reported in the text but not in the figures, please use the page number instead of the figure number.

**Note:** Mean and standard deviation are not appropriate on small samples, and plotting independent data points is usually more informative. When technical replicates are reported, error and significance measures reflect the experimental variability and not the variability of the biological process; it is misleading not to state this clearly.

|         | FIGURE NUMBER | TEST USED                           |          | n            |                                    |          | DESCRIPTIVE STATS (AVERAGE, VARIANCE)                                           |          | P VALUE     |          | DEGREES OF FREEDOM & F/t/z/R/ETC VALUE |      |
|---------|---------------|-------------------------------------|----------|--------------|------------------------------------|----------|---------------------------------------------------------------------------------|----------|-------------|----------|----------------------------------------|------|
|         |               | WHICH TEST?                         | PAGE     | EXACT VALUE  | DEFINED?                           | PAGE     | REPORTED?                                                                       | PAGE     | EXACT VALUE | PAGE     | VALUE                                  | PAGE |
| example | 1a            | one-way ANOVA                       | 4        | 9, 9, 10, 15 | mice from at least 3 litters/group | 4        | error bars are mean +/- SEM                                                     | 4        | p = 0.044   | 4        | F(3, 36) = 2.97                        | 4    |
| example | results, pg 6 | unpaired t-test                     | 6        | 15           | slices from 10 mice                | 6        | error bars are mean +/- SEM                                                     | 6        | p = 0.0006  | 6        | t(28) = 2.808                          | 6    |
| +<br>-  | 2b,c,d,<br>e  | Cluster corrected, permutation test | met hods | 30,23,6,13   | coherent neuron groupings,         | figur e  | mean 95% confidence interval                                                    | met hods | p = 0.05    | met hods | N/A                                    |      |
| +<br>-  | 3a,b          | Wilcoxon ranksum test               | resu lts | 30,23,13     | coherent neuron groupings          | resu lts | mean - first point statistical test falls below 0.05 for three consecutive bins | figur e  | p = 0.05    | resu lts | N/A                                    |      |

|               |             | TEST USED                           |                | n          |                                                                   |           | DESCRIPTIVE STATS (AVERAGE, VARIANCE)                                           |             | P VALUE                                                    |         | DEGREES OF FREEDOM & F/t/z/R/ETC VALUE                                |  |
|---------------|-------------|-------------------------------------|----------------|------------|-------------------------------------------------------------------|-----------|---------------------------------------------------------------------------------|-------------|------------------------------------------------------------|---------|-----------------------------------------------------------------------|--|
| FIGURE NUMBER | WHICH TEST? | PAGE                                | EXACT VALUE    | DEFINED?   | PAGE                                                              | REPORTED? | PAGE                                                                            | EXACT VALUE | PAGE                                                       | VALUE   | PAGE                                                                  |  |
| +<br>-        | 3c          | FDR corrected Wilcoxon ranksum test | results        | 30,23,13   | 40 permutations of coherent neuron groupings,                     | results   | error bars are mean +/- 95%CI                                                   | figure      | p = 0.05                                                   | figure  | z = -1.96, N/A                                                        |  |
| +<br>-        | 3d          | Wilcoxon ranksum test               | results        | 30,23,13   | 40 permutations of coherent neuron groupings                      | results   | mean - first point statistical test falls below 0.05 for three consecutive bins | figure      | p = 0.05                                                   | figure  | Z = -1.96, N/A                                                        |  |
| +<br>-        | 4c,d        | Wilcoxon ranksum test               | results        | 30,23,13   | 40 permutations of coherent neuron groupings,                     | results   | error bars are mean +/- SEM                                                     | results     | p = 9.6e-10, p = 1.3e-10 p = 0.14                          | results | z=-6.423,z = -6.12,z = 1.47, N/A                                      |  |
| +<br>-        | 5a,b        | Wilcoxon ranksum test               | results        | 25         | 40 permutations of coherent neuron groupings                      | methods   | error bars are mean +/- SEM                                                     | figure      | p = 0.03, p = 0.351                                        | results | z = -2.97, z = -0.9, N/A                                              |  |
| +<br>-        | 5c,d        | Wilcoxon ranksum test               | results        | 28         | 40 permutations of coherent neuron groupings                      | methods   | error bars are mean +/- SEM                                                     | figure      | p = 0.0087, p = 7.1e-6                                     | results | z = -2.6, z = -4.49, N/A                                              |  |
| +<br>-        | 6a,b        | Wilcoxon ranksum test               | results        | 24         | 40 permutations of fastest grouping of neurons                    | methods   | error bars are mean +/- SEM                                                     | figure      | p = 2.9e-7                                                 | results | z = -5.54, N/A                                                        |  |
| +<br>-        | 7a,b        | Wilcoxon ranksum test               | results        | 30,23      | defined by rank ordering neurons by local coherence values        | methods   | error bars are mean +/- SEM                                                     | figure      | p = 1.2e-6                                                 | results | z = -5.3, N/A                                                         |  |
| +<br>-        | 7c          | Wilcoxon ranksum test               | results        | 30,23      | defined by rank ordering neurons by local coherence values        | methods   | error bars are mean +/- SEM                                                     | figure      | p = 0.0076                                                 | results | z = -2.66, N/A                                                        |  |
| +<br>-        | S1a,b       | FDR corrected Wilcoxon ranksum test | figure         | 30,23,13,6 | 40 permutations of coherent neuron groupings                      | results   | error bars are mean +/- 95%CI                                                   | figure      | p = 0.05                                                   | figure  | z = -1.96, N/A                                                        |  |
| +<br>-        | S1c         | FDR corrected Wilcoxon ranksum test | results        | 30,23,13   | 40 permutations of coherent neuron groupings                      | results   | error bars are mean +/- SEM                                                     | figure      | p = 9.6e-10, 1.3e-10, p = 0.14                             | results | z = -5.99, z = -5.99, z = -1.45, N/A                                  |  |
| +<br>-        | S1d         | FDR corrected Wilcoxon ranksum test | results/figure | 17,13      | 40 permutations of coherent neuron groupings for each monkey      | results   | error bars are mean +/- SEM                                                     | figure      | p = 5.5e-10, p = 7.5e-10, p = 3.7e-10, p = 3.7e-10         | figure  | z = -4.0, z = -5.99, z = -5.99, z = -5.99, N/A                        |  |
| +<br>-        | S2a,b,c,d   | Wilcoxon ranksum test               | results        | 117        | 40 permutations of LIP and PRR groupings                          | results   | error bars are mean +/- SEM                                                     | figure      | p = 0.47                                                   | results | r = -0.51, N/A                                                        |  |
| +<br>-        | S5a,b       | Wilcoxon ranksum test               | results        | 30,24,24   | defined by rank ordering neurons by baseline or delay firing rate | methods   | error bars are mean +/- SEM                                                     | figure      | p = 9.7e-6                                                 | results | z = 2-4.89, N/A                                                       |  |
| +<br>-        | S7          | Wilcoxon ranksum test               | figure         | 30,23,13,6 | Coherent neuron groupings                                         | results   | error bars are mean +/- SEM                                                     | figure      | p = 0.54, p = 0.82, p = 0.21, p = 0.99, p = 0.39, p = 0.51 | figure  | z = -0.61, z = -0.2, z = -1.25, z = -0.025, z = -0.86, z = -0.67, N/A |  |
| +<br>-        | S8a,b       | FDR corrected Wilcoxon ranksum test | figure         | 30,23,13,6 | Coherent neuron groupings                                         | results   | error bars are mean +/- SEM                                                     | figure      | p = 0.05                                                   | figure  | z = -1.96, N/A                                                        |  |
| +<br>-        | S8c,d       | FDR corrected Wilcoxon ranksum test | figure         | 30,23,13,6 | 40 permutations of coherent neuron groupings                      | results   | error bars are mean +/- 95%CI                                                   | figure      | p = 0.05                                                   | figure  | z = -1.96, N/A                                                        |  |
| +<br>-        | S8e         | Wilcoxon ranksum test               | results        | 30,23,13   | 40 permutations of coherent neuron groupings                      | results   | error bars are mean +/- SEM                                                     | figure      | p = 3.42e-6                                                | results | z = -4.64, N/A                                                        |  |
| +<br>-        | S8f         | Wilcoxon ranksum test               | results        | 30,23,13   | 40 permutations of coherent neuron groupings                      | results   | error bars are mean +/- SEM                                                     | figure      | p = 1.5e-7 p = 5.8e-7                                      | results | z = -5.25, z = -5.42, N/A                                             |  |

|        |        |                       |         |       |                               |        |                                      |        |          |         |                |  |
|--------|--------|-----------------------|---------|-------|-------------------------------|--------|--------------------------------------|--------|----------|---------|----------------|--|
| +<br>- | S9     | Wilcoxon ranksum test | figure  | 27,45 | which electrode was used      | figure | mean+/- 95% CI                       | figure | p = 0.47 | figure  | z = 0.10, N/A  |  |
| +<br>- | S10a,b | Hartigan's Dip Test   | results | 72    | All coherent neuron groupings | figure | actual value counts - all data shown | figure | p=0.015  | results | r = 0.0664,N/A |  |

## ► Representative figures

1. Are any representative images shown (including Western blots and immunohistochemistry/staining) in the paper?

If so, what figure(s)?

Yes, Figure 1 c and d

2. For each representative image, is there a clear statement of how many times this experiment was successfully repeated and a discussion of any limitations in repeatability?

If so, on what page(s) is this reported?

Yes the n is stated in the results section

## ► Statistics and general methods

1. Is there a justification of the sample size?

If so, how was it justified?

On what page(s)?

Even if no sample size calculation was performed, authors should report why the sample size is adequate to measure their effect size.

Statistical methods were not used to predetermine sample sizes however the sample sizes in this work are similar to those reported in previous publications. Online methods

2. Are statistical tests justified as appropriate for every figure?

On what page(s)?

Yes, non parametric tests such as permutation tests and RankSum tests were used to ensure the most conservative estimates as well as to ensure no assumptions about the distribution of the data.

- a. If there is a section summarizing the statistical methods in the methods, is the statistical test for each experiment clearly defined?

Statistical methods are outlined in the section Neuronal Methods and Analysis and each test and p value is restated with the numbers provided in the results section.

- b. Do the data meet the assumptions of the specific statistical test you chose (e.g. normality for a parametric test)?

Where is this described?

Non-parametric tests (Ranksum and permutation tests) have been used.

- c. Is there any estimate of variance within each group of data?

Is the variance similar between groups that are being statistically compared?

Where is this described?

The variance within each population of neurons is stated in each section in which comparisons are made. Variance was similar between groups being tested.

- d. Are tests specified as one- or two-sided?

Yes, online methods

- e. Are there adjustments for multiple comparisons?

Yes, Figure 2, b,c,d e are cluster corrected. Figure 3 c is FDR corrected.

3. Are criteria for excluding data points reported?  
Was this criterion established prior to data collection?  
On what page(s) is this described?
- Neurons that did not respond to the task or too few trials recorded were excluded from further analysis. This criteria was established prior to data collection. Described in the online methods.
4. Define the method of randomization used to assign subjects (or samples) to the experimental groups and to collect and process data.  
If no randomization was used, state so.  
On what page(s) does this appear?
- No randomization was done
5. Is a statement of the extent to which investigator knew the group allocation during the experiment and in assessing outcome included?  
If no blinding was done, state so.  
On what page(s)?
- No blinding was done as this was not critical to the experimental results
6. For experiments in live vertebrates, is a statement of compliance with ethical guidelines/regulations included?  
On what page(s)?
- Yes - online methods
7. Is the species of the animals used reported?  
On what page(s)?
- Yes - Macaca mulatta, online methods
8. Is the strain of the animals (including background strains of KO/transgenic animals used) reported?  
On what page(s)?
- N/A
9. Is the sex of the animals/subjects used reported?  
On what page(s)?
- Yes, both males, online methods
10. Is the age of the animals/subjects reported?  
On what page(s)?
- No
11. For animals housed in a vivarium, is the light/dark cycle reported?  
On what page(s)?
- Yes, 7am/7pm, online methods
12. For animals housed in a vivarium, is the housing group (i.e. number of animals per cage) reported?  
On what page(s)?
- Yes, one cage mate, online methods
13. For behavioral experiments, is the time of day reported (e.g. light or dark cycle)?  
On what page(s)?
- Yes, experiments were always conducted during the light cycle, online methods)

14. Is the previous history of the animals/subjects (e.g. prior drug administration, surgery, behavioral testing) reported?

On what page(s)?

This was the first study that the animals were used for.

a. If multiple behavioral tests were conducted in the same group of animals, is this reported?

On what page(s)?

N/A

15. If any animals/subjects were excluded from analysis, is this reported?

On what page(s)?

No animals were excluded

a. How were the criteria for exclusion defined?

Where is this described?

N/A

b. Specify reasons for any discrepancy between the number of animals at the beginning and end of the study.

Where is this described?

N/A

## ▶ Reagents

1. Have antibodies been validated for use in the system under study (assay and species)?

No antibodies were used

a. Is antibody catalog number given?

On what page(s) does this appear?

N/A

b. Where were the validation data reported (citation, supplementary information, Antibodypedia)?

On what page(s) does this appear?

N/A

2. If cell lines were used to reflect the properties of a particular tissue or disease state, is their source identified?

On what page(s)?

No cell lines were used

a. Were they recently authenticated?

On what page(s) is this information reported?

N/A

## ▶ Data deposition

Data deposition in a public repository is mandatory for:

- a. Protein, DNA and RNA sequences
- b. Macromolecular structures
- c. Crystallographic data for small molecules
- d. Microarray data

Deposition is strongly recommended for many other datasets for which structured public repositories exist; more details on our data policy are available [here](#). We encourage the provision of other source data in supplementary information or in unstructured repositories such as [Figshare](#) and [Dryad](#).

1. Are accession codes for deposit dates provided?

No

On what page(s)?

## ▶ Computer code/software

Any custom algorithm/software that is central to the methods must be supplied by the authors in a usable and readable form for readers at the time of publication. However, referees may ask for this information at any time during the review process.

1. Identify all custom software or scripts that were required to conduct the study and where in the procedures each was used.

No custom software or scripts were used

2. Is computer source code/software provided with the paper or deposited in a public repository? Indicate in what form this is provided or how it can be obtained.

No however all scripts can be provided on request

## ▶ Human subjects

1. Which IRB approved the protocol?

Where is this stated?

No humans were used

2. Is demographic information on all subjects provided?

On what page(s)?

N/A

3. Is the number of human subjects, their age and sex clearly defined?

On what page(s)?

N/A

4. Are the inclusion and exclusion criteria (if any) clearly specified?

On what page(s)?

N/A

5. How well were the groups matched?

Where is this information described?

N/A

6. Is a statement confirming that informed consent was obtained from all subjects included?

On what page(s)?

N/A

7. For publication of patient photos, is a statement confirming that consent to publish was obtained included?

On what page(s)?

N/A

## ► fMRI studies

For papers reporting functional imaging (fMRI) results please ensure that these minimal reporting guidelines are met and that all this information is clearly provided in the methods:

1. Were any subjects scanned but then rejected for the analysis after the data was collected?

fMRI was not used

- a. If yes, is the number rejected and reasons for rejection described?

On what page(s)?

N/A

2. Is the number of blocks, trials or experimental units per session and/or subjects specified?

On what page(s)?

N/A

3. Is the length of each trial and interval between trials specified?

N/A

4. Is a blocked, event-related, or mixed design being used? If applicable, please specify the block length or how the event-related or mixed design was optimized.

N/A

5. Is the task design clearly described?

Where?

N/A

6. How was behavioral performance measured?

N/A

7. Is an ANOVA or factorial design being used?

N/A

8. For data acquisition, is a whole brain scan used?

If not, state area of acquisition.

N/A

- a. How was this region determined?

N/A

9. Is the field strength (in Tesla) of the MRI system stated?
- a. Is the pulse sequence type (gradient/spin echo, EPI/spiral) stated?
- b. Are the field-of-view, matrix size, slice thickness, and TE/TR/flip angle clearly stated?
10. Are the software and specific parameters (model/functions, smoothing kernel size if applicable, etc.) used for data processing and pre-processing clearly stated?
11. Is the coordinate space for the anatomical/functional imaging data clearly defined as subject/native space or standardized stereotaxic space, e.g., original Talairach, MNI305, ICBM152, etc? On what page(s)?
12. If there was data normalization/standardization to a specific space template, are the type of transformation (linear vs. nonlinear) used and image types being transformed clearly described? On what page(s)?
13. How were anatomical locations determined, e.g., via an automated labeling algorithm (AAL), standardized coordinate database (Talairach daemon), probabilistic atlases, etc.?
14. Were any additional regressors (behavioral covariates, motion etc) used?
15. Is the contrast construction clearly defined?
16. Is a mixed/random effects or fixed inference used?
- a. If fixed effects inference used, is this justified?
17. Were repeated measures used (multiple measurements per subject)?
- a. If so, are the method to account for within subject correlation and the assumptions made about variance clearly stated?
18. If the threshold used for inference and visualization in figures varies, is this clearly stated?
19. Are statistical inferences corrected for multiple comparisons?
- a. If not, is this labeled as uncorrected?



20. Are the results based on an ROI (region of interest) analysis?

N/A

a. If so, is the rationale clearly described?

N/A

b. How were the ROI's defined (functional vs anatomical localization)?

N/A

21. Is there correction for multiple comparisons within each voxel?

N/A

22. For cluster-wise significance, is the cluster-defining threshold and the corrected significance level defined?

N/A

## ► Additional comments

---

Additional Comments
